# Supplementary material for: Gasdermin D is an executor of pyroptosis and required for interleukin-1β secretion
Source: PubMed Central journal article supplement — Cell Res. 2015 Nov 27;25(12):1285–98. doi: 10.1038/cr.2015.139 (PMC4670995; doi:10.1038/cr.2015.139), 2015-11-27
Supplement: cr2015139x2.pdf [file cr2015139x2.pdf]

A

| Peptide sequence                                 | charge | mz       | ide_score | swath_score |
|--------------------------------------------------|--------|----------|-----------|-------------|
| NVIKEVSGSRGDLIPVDSLRL                            | 3      | 718.7319 | 0.999999  | 1           |
| HLQQPENKILQQLR                                   | 3      | 582.3297 | 0.999999  | 1           |
| VMLSGMGEGK                                       | 2      | 504.7457 | 0.999994  | 1           |
| KKMVTIPAGSILAFR                                  | 3      | 544.6599 | 0.999979  | 1           |
| VSDVVDGNIQGR                                     | 2      | 629.8221 | 0.999979  | 1           |
| MVTIPAGSILAFR                                    | 2      | 688.3915 | 0.994541  | 1           |
| EVGSRGDLIPVDSLRL                                 | 3      | 567.3035 | 0.985607  | 1           |
| NSTSFRRPYC(Carbamidomethyl)LLNRK                 | 3      | 585.9696 | 0.951738  | 1           |
| NSTSFRRPYC(Carbamidomethyl)LLNR                  | 2      | 814.4036 | 0.935954  | 1           |
| NSTSFRRPYC(Carbamidomethyl)LLNR                  | 3      | 543.2755 | 0.926105  | 1           |
| ISGGAAVSDSSASM(Oxidation)NVC(Carbamidomethyl)ILR | 3      | 700.0009 | 0.457755  | 1           |

B

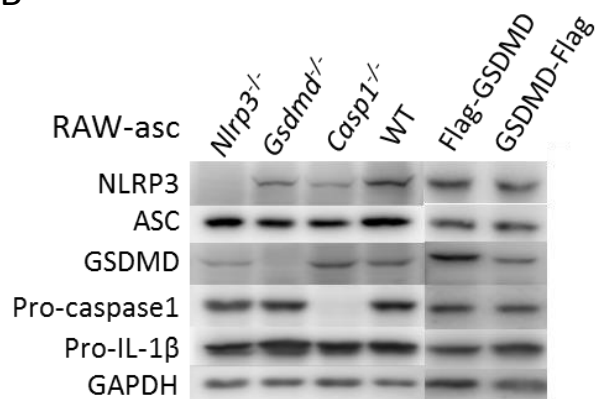

**Figure S2. Identification of GSDMD by MS and characterization of RAW-asc derived cells.** A. Peptide information of GSDMD identified by quantitative MS analysis. Peptide sequences, modifications, charges and mz were showed. Ide\_score means iprophet probability, and swath\_score means the probability of the peptide existing in the SWATH-MS file. The time-dependent increase in the amounts of these peptides in NLRP3 immuno-complex was revealed by Group-DIA and the data of xxxxxx peptide is showed in Fig. 1A. B. Gene deletion of *Nlrp3*, *Casp1*, *Gsdmd* in RAW-asc cells and reconstitution of GSDMD expression in *Gsdmd*<sup>-/-</sup> RAW-asc cells were confirmed by immunoblotting with corresponding antibodies.
