# Supplementary material for: Gasdermin D is an executor of pyroptosis and required for interleukin-1β secretion
Source: PubMed Central journal article supplement — Cell Res. 2015 Nov 27;25(12):1285–98. doi: 10.1038/cr.2015.139 (PMC4670995; doi:10.1038/cr.2015.139), 2015-11-27
Supplement: cr2015139x3.pdf [file cr2015139x3.pdf]

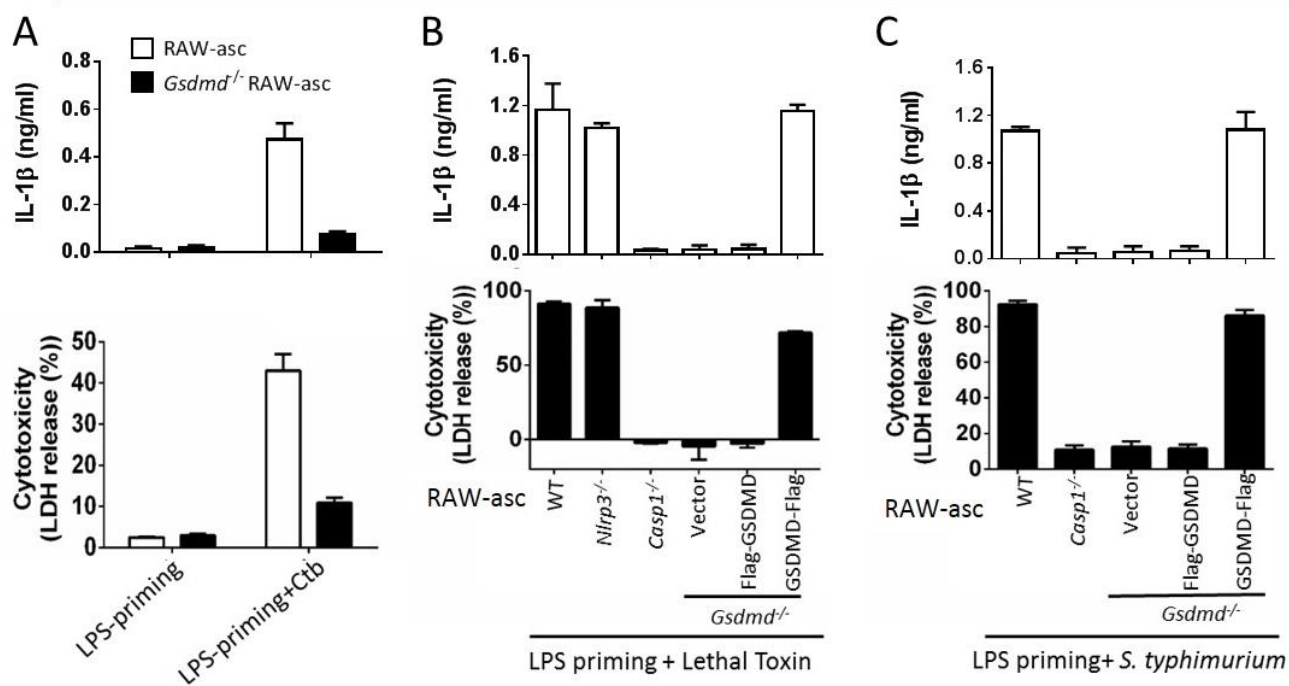

**Figure S3. GSDMD is required for canonical and non-canonical inflammasome-mediated pyroptosis and IL-1 $\beta$  secretion.** A. The cells as indicated were primed with LPS for 4 h and then were treated with Ctb (20  $\mu$ g/ml) to transfect LPS into the cells, or B. with Lethal toxin (2  $\mu$ g/ml) or C. with *S. typhimurium* (100 MOI). Two hours later, IL-1 $\beta$  and LDH that released from the cells were measured. Graphs show mean  $\pm$  s.d of triplicate wells and represent three independent experiments.
