# Supplementary material for: Gasdermin D is an executor of pyroptosis and required for interleukin-1β secretion
Source: PubMed Central journal article supplement — Cell Res. 2015 Nov 27;25(12):1285–98. doi: 10.1038/cr.2015.139 (PMC4670995; doi:10.1038/cr.2015.139), 2015-11-27
Supplement: cr2015139x4.pdf [file cr2015139x4.pdf]

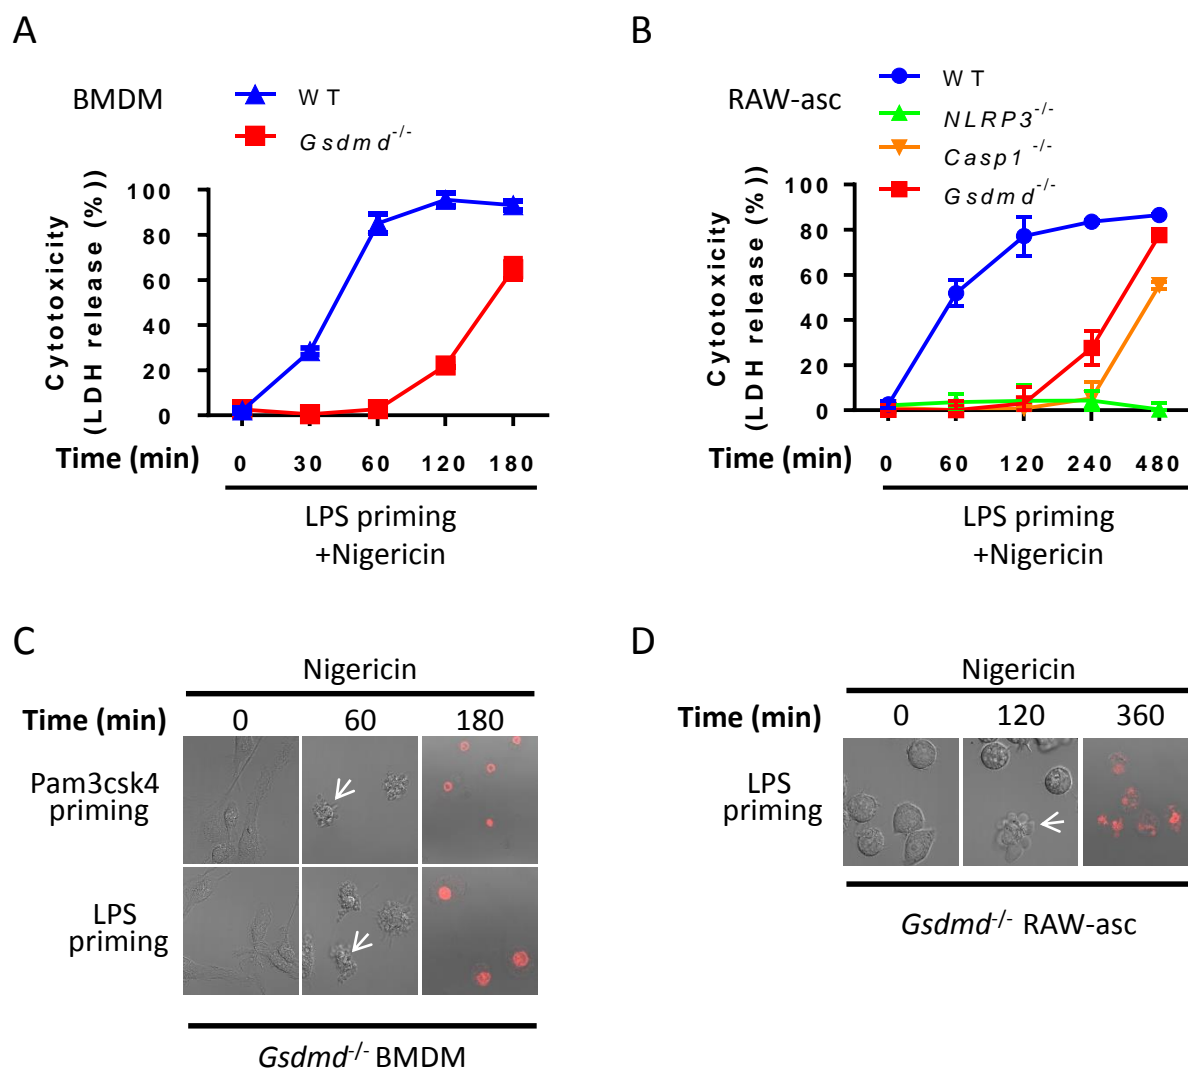

**Figure S4.** Secondary necrosis of apoptotic cells in inflammasome stimuli-treated *Gsdmd*<sup>-/-</sup> cells. **A.** WT and *Gsdmd*<sup>-/-</sup> BMDM were primed with LPS for 4 hours and stimulated with nigericin for different periods of time as indicated. LDH release was measured and shown. **B.** The same as in A except that WT and *Gsdmd*<sup>-/-</sup> RAW-asc cells were used. **C.** WT and *Gsdmd*<sup>-/-</sup> BMDM were primed with Pam3csk4 for 5 hours or LPS for 4 hours and then stimulated with nigericin for different periods of time as indicated. Images were taken at the time points indicated. **D.** WT and *Gsdmd*<sup>-/-</sup> RAW-asc cells were primed with LPS for 4 hours and stimulated with nigericin for different periods of time as indicated. Images were taken at the time points indicated.
